# Supplementary material for: Influence of Triazole Pesticides on Wine Flavor and Quality Based on Multidimensional Analysis Technology
Source: Molecules. 2020 Nov 28;25(23):5596. doi: 10.3390/molecules25235596 (PMC7730357; doi:10.3390/molecules25235596)
Supplement: Supplementary file 1 [file molecules-25-05596-s001.pdf]

[Supplementary material] including 4 figures and 2 tables

# Influence of triazole pesticides on wine flavor and quality based on multidimensional analysis technology

Ouli Xiao <sup>1,2,†</sup>, Minmin Li <sup>3,†</sup>, Jieyin Chen <sup>2</sup>, Ruixing Li <sup>3</sup>, Rui Quan <sup>3</sup>, Zezhou Zhang <sup>1,2</sup>, Zhiqiang Kong <sup>2,3,\*</sup> and Xiaofeng Dai <sup>1,2\*</sup>

<sup>1</sup> Feed Research Institute, Chinese Academy of Agricultural Sciences, Beijing 100081, China; xiaoouli123@163.com (O.X.); zhangzezhou7689@163.com (Z.Z.)

<sup>2</sup> State Key Laboratory for Biology of Plant Diseases and Insect Pests, Institute of Plant Protection, Chinese Academy of Agricultural Sciences, Beijing 100193, China; chenjieyin@caas.cn (J.C.)

<sup>3</sup> Key Laboratory of Agro-Products Quality and Safety Control in Storage and Transport Process, Ministry of Agriculture and Rural Affairs/Institute of Food Science and Technology, Chinese Academy of Agricultural Sciences, Beijing 100193, China; liminmin@caas.cn (M.L.); liruixing06@163.com (R.L.); qr802319@163.com (R.Q.)

\* Correspondence: kongzhiqiang@caas.cn (Z.K.); daixiaofeng\_caas@126.com (X.D.);

Tel.: +86-10-62813566 (Z.K.); +86-10-62813566 (X.D.)

† These authors contributed equally to this work.

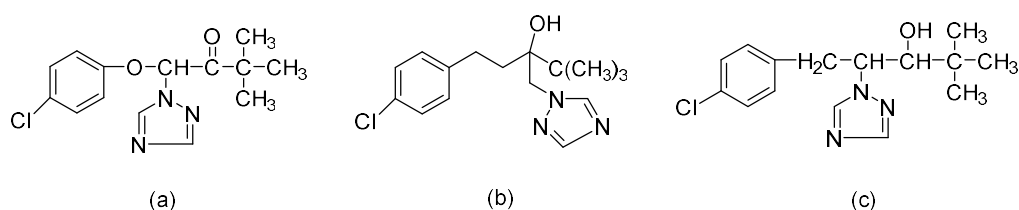

**Fig. 1.** Structure of triadimefon (a), tebuconazole (b), paclobutrazol (c).

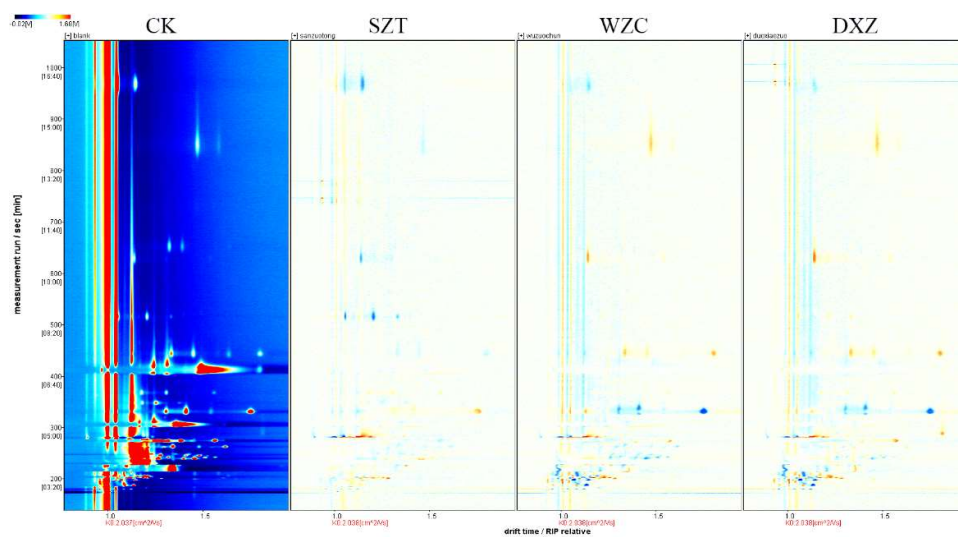

**Fig. 2.** GC-IMS spectra of volatile organic compounds in four groups of wine

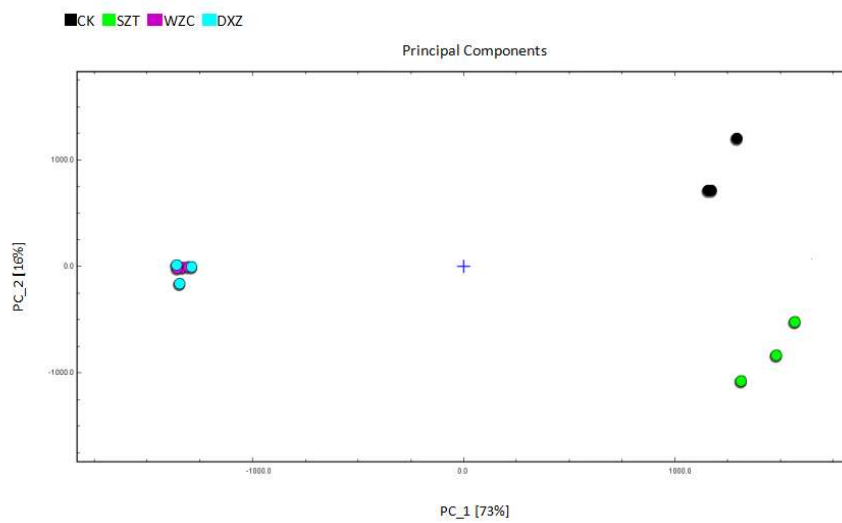

**Fig.3.** PCA (Principal Component Analysis) diagram of all samples.

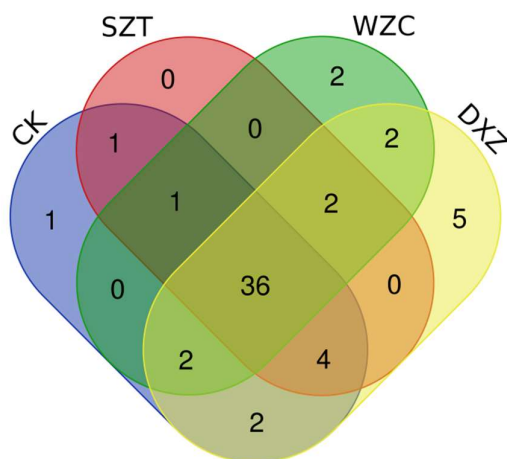

**Fig.4.** Veen diagram of the common volatile components in the four wine samples.

**Table 1.** Electronic nose principal component analysis table.

|     | CK    | SZT   | WZC   | DXZ   |
|-----|-------|-------|-------|-------|
| CK  | -     | 0.563 | 0.885 | 0.637 |
| SZT | 0.563 | -     | 0.530 | 0.613 |
| WZC | 0.885 | 0.530 | -     | 0.592 |
| DXZ | 0.637 | 0.613 | 0.592 | -     |

The data in the table is the discrimination power value between the two samples, which higher than 0.5 indicating that there was a significant difference in flavor between the samples. “-” it is the same group of samples, not comparative

**Table 2.** Taste differences of wines

| Product names | Reference | Samples Distances | P Value |
|---------------|-----------|-------------------|---------|
| CK            | DXZ       | 194.18            | 0.00    |
| CK            | SZT       | 53.30             | 0.00    |
| CK            | WZC       | 54.92             | 0.00    |
| DXZ           | SZT       | 230.05            | 0.00    |
| DXZ           | WZC       | 166.65            | 0.00    |
| SZT           | WZC       | 72.74             | 0.00    |

P value of 0 means significant difference between the two groups
